# Supplementary material
Source: PubMed Central journal article supplement (PMC3387856)
Supplement: supp_peds.2010-1567_zpe608117506p.pdf [file supp_peds.2010-1567_zpe608117506p.pdf]

## Supplemental Information

**SUPPLEMENTAL APPENDIX 1** Success Rate (SR) and Event Identification Rate (EIR) of Various Observation Times for Apnea and Bradycardia, Stratified According to Gestational Age or PMA of the Last Event

| Apnea SR                   |                      |                      |                      |                      |                      |
|----------------------------|----------------------|----------------------|----------------------|----------------------|----------------------|
| Gestational Age Categories |                      |                      |                      |                      |                      |
|                            | ≤ 26 wk              | 27-28 wk             | 29-30 wk             | 31-32 wk             | 33-34 wk             |
| 1 d                        | 77.8<br>(70.8, 84.3) | 82.9<br>(78.2, 87.4) | 85.6<br>(82.1, 88.8) | 91.7<br>(89.6, 93.9) | 95.7<br>(94.3, 96.9) |
| 2 d                        | 83.6<br>(78.6, 88.5) | 88.2<br>(84.5, 91.4) | 89.8<br>(87.2, 92.2) | 94.6<br>(93.1, 96.1) | 96.7<br>(95.6, 97.6) |
| 3 d                        | 86.1<br>(81.4, 90.6) | 91.2<br>(88.3, 94)   | 91.7<br>(89.4, 93.7) | 95.6<br>(94.2, 96.9) | 97.4<br>(96.4, 98.2) |
| 4 d                        | 88.7<br>(84.5, 92.5) | 92.3<br>(89.6, 94.7) | 92.5<br>(90.3, 94.4) | 96.1<br>(94.9, 97.3) | 97.8<br>(96.9, 98.5) |
| 5 d                        | 89.4<br>(85.1, 93.2) | 92.5<br>(89.9, 94.9) | 93<br>(90.9, 94.9)   | 96.6<br>(95.3, 97.7) | 98.2<br>(97.4, 98.9) |
| 6 d                        | 90.4<br>(86.3, 94)   | 93.4<br>(90.7, 95.6) | 93.6<br>(91.7, 95.4) | 96.8<br>(95.7, 97.9) | 98.5<br>(97.7, 99.1) |
| 7 d                        | 90.8<br>(86.9, 94.2) | 93.9<br>(91.2, 96.1) | 94.8<br>(93, 96.4)   | 97.1<br>(96, 98.1)   | 98.6<br>(97.9, 99.2) |
| 8 d                        | 91.1<br>(87.4, 94.5) | 94<br>(91.5, 96.2)   | 95.3<br>(93.5, 96.9) | 97.4<br>(96.3, 98.4) | 98.8<br>(98.1, 99.3) |
| 9 d                        | 92.1<br>(88.4, 95.3) | 95.2<br>(92.9, 97.2) | 96.1<br>(94.5, 97.4) | 97.7<br>(96.7, 98.6) | 99<br>(98.4, 99.5)   |
| 10 d                       | 92.3<br>(88.8, 95.5) | 95.3<br>(93, 97.3)   | 96.1<br>(94.5, 97.5) | 98<br>(97, 98.8)     | 99.1<br>(98.5, 99.6) |
| 11 d                       | 93.3<br>(90, 96.3)   | 95.9<br>(93.9, 97.8) | 96.2<br>(94.6, 97.5) | 98.4<br>(97.5, 99.1) | 99.2<br>(98.6, 99.7) |
| 12 d                       | 94.1<br>(90.8, 97)   | 96.2<br>(94, 98)     | 96.3<br>(94.7, 97.6) | 98.5<br>(97.6, 99.2) | 99.2<br>(98.6, 99.7) |
| 13 d                       | 94.6<br>(91.5, 97.3) | 96.2<br>(94, 98)     | 96.3<br>(94.7, 97.6) | 98.7<br>(97.9, 99.3) | 99.3<br>(98.8, 99.7) |
| 14 d                       | 95.2<br>(92.3, 97.8) | 96.5<br>(94.5, 98.2) | 96.8<br>(95.3, 98)   | 98.8<br>(98.1, 99.5) | 99.4<br>(98.9, 99.8) |

| Apnea EIR                  |                      |                      |                      |                      |                      |
|----------------------------|----------------------|----------------------|----------------------|----------------------|----------------------|
| Gestational Age Categories |                      |                      |                      |                      |                      |
|                            | ≤ 26 wk              | 27-28 wk             | 29-30 wk             | 31-32 wk             | 33-34 wk             |
| 1 d                        | 0<br>(0, 0)          |
| 2 d                        | 20.8<br>(12, 31.1)   | 27.3<br>(17.6, 37.3) | 25.6<br>(17.9, 33.4) | 30.1<br>(21.4, 40)   | 18.6<br>(10.2, 27.2) |
| 3 d                        | 32.2<br>(19.9, 44.9) | 44.8<br>(32.8, 56.9) | 37<br>(27.4, 46.2)   | 40.9<br>(30.5, 52.9) | 33.5<br>(21.7, 46.3) |
| 4 d                        | 44.3<br>(30.6, 57.6) | 49.8<br>(37.8, 62.4) | 41.5<br>(31.1, 50.9) | 48.6<br>(37.4, 60.8) | 43.3<br>(30.1, 56.7) |
| 5 d                        | 46.4<br>(32.1, 60.8) | 51<br>(38.7, 64)     | 44.9<br>(34.1, 54.9) | 53.7<br>(41.6, 65.6) | 54.2<br>(40.4, 68.4) |
| 6 d                        | 51.2<br>(36.5, 65.4) | 56<br>(42.8, 68.9)   | 50.1<br>(38.8, 60.5) | 56.5<br>(44, 68.5)   | 61.3<br>(47.6, 75.5) |
| 7 d                        | 52.8<br>(38.3, 67.2) | 58.3<br>(44.8, 71.3) | 59.5<br>(47.4, 69.6) | 59.8<br>(46.8, 71.4) | 64.4<br>(50.7, 78.7) |
| 8 d                        | 53.9<br>(39, 68.6)   | 59.1<br>(45.7, 72.2) | 62.7<br>(50.9, 73.4) | 64<br>(51.8, 75.8)   | 69.4<br>(55.8, 82.1) |
| 9 d                        | 58.7<br>(43.2, 73.6) | 66.6<br>(53.2, 79.3) | 69.2<br>(58.5, 78.9) | 68.2<br>(55.6, 79.6) | 74.4<br>(61, 86.3)   |
| 10 d                       | 59.7<br>(44.3, 74.8) | 67.1<br>(53.7, 79.8) | 69.2<br>(58.6, 79.1) | 72.3<br>(60.3, 83.5) | 76.9<br>(63.3, 88.5) |
| 11 d                       | 64.7<br>(48.5, 78.9) | 72<br>(58.9, 84.2)   | 69.6<br>(59, 79.4)   | 78.6<br>(67.8, 88.4) | 79.4<br>(67.4, 90.3) |
| 12 d                       | 68.6<br>(52.3, 82.8) | 73.2<br>(60.2, 85.2) | 70.4<br>(59.8, 80.4) | 79.6<br>(68.9, 89.5) | 79.4<br>(67.4, 90.3) |
| 13 d                       | 71.7<br>(56.7, 85)   | 73.2<br>(60.2, 85.2) | 70.4<br>(59.8, 80.4) | 82.4<br>(72.4, 91.3) | 81.9<br>(70.3, 92.4) |
| 14 d                       | 74.8<br>(60, 88.2)   | 75.7<br>(63.4, 87)   | 74.8<br>(64.5, 84.1) | 84.5<br>(74.6, 93)   | 84.4<br>(73.5, 93.8) |
| Bradycardia SR             |                      |                      |                      |                      |                      |
| Gestational Age Categories |                      |                      |                      |                      |                      |
|                            | ≤ 26 wk              | 27-28 wk             | 29-30 wk             | 31-32 wk             | 33-34 wk             |
| 1 d                        | 72.5<br>(65.8, 79.7) | 77.3<br>(71.9, 82.2) | 79.4<br>(75.3, 83.2) | 88.2<br>(85.5, 90.7) | 93.7<br>(91.9, 95.2) |
| 2 d                        | 81.1<br>(76.1, 85.9) | 85.6<br>(81.9, 89.3) | 86.1<br>(83.2, 88.9) | 91.9<br>(89.9, 93.7) | 95.4<br>(94.1, 96.6) |
| 3 d                        | 84.8<br>(80.4, 88.8) | 88.8<br>(85.6, 91.8) | 88.5<br>(85.9, 91)   | 93.8<br>(92.1, 95.4) | 96.3<br>(95.2, 97.4) |
| 4 d                        | 88<br>(83.8, 92)     | 90.4<br>(87.5, 93.2) | 89.9<br>(87.3, 92.3) | 94.3<br>(92.6, 95.8) | 96.8<br>(95.8, 97.8) |

## SUPPLEMENTAL APPENDIX 1 Continued

|                            |                      |                      |                      |                      |                      |
|----------------------------|----------------------|----------------------|----------------------|----------------------|----------------------|
| 5 d                        | 90.4<br>(86.3, 94.1) | 91.8<br>(89.1, 94.5) | 91.4<br>(89.1, 93.6) | 95.3<br>(93.8, 96.7) | 97.5<br>(96.6, 98.3) |
| 6 d                        | 92<br>(88.4, 95.4)   | 92.2<br>(89.5, 94.8) | 92.7<br>(90.7, 94.7) | 95.9<br>(94.5, 97.2) | 98<br>(97.2, 98.7)   |
| 7 d                        | 92.5<br>(89.1, 95.7) | 92.4<br>(89.7, 94.9) | 93.6<br>(91.6, 95.5) | 96.3<br>(95, 97.5)   | 98.2<br>(97.5, 98.9) |
| 8 d                        | 93.2<br>(89.9, 96.3) | 92.6<br>(90, 95.1)   | 93.8<br>(91.8, 95.7) | 96.9<br>(95.7, 98)   | 98.6<br>(97.9, 99.2) |
| 9 d                        | 93.8<br>(90.5, 96.7) | 93.5<br>(91.1, 95.8) | 94.6<br>(92.7, 96.3) | 97.3<br>(96.2, 98.3) | 98.7<br>(98, 99.3)   |
| 10 d                       | 94<br>(90.8, 96.8)   | 93.8<br>(91.3, 96)   | 95.1<br>(93.3, 96.8) | 97.3<br>(96.2, 98.3) | 98.9<br>(98.3, 99.4) |
| 11 d                       | 95.6<br>(92.7, 98)   | 94.2<br>(91.8, 96.3) | 95.1<br>(93.3, 96.8) | 97.8<br>(96.8, 98.7) | 99<br>(98.4, 99.5)   |
| 12 d                       | 95.8<br>(93, 98.2)   | 94.8<br>(92.5, 96.8) | 95.1<br>(93.4, 96.8) | 98<br>(97.1, 98.9)   | 99<br>(98.4, 99.5)   |
| 13 d                       | 95.8<br>(93, 98.2)   | 95.1<br>(92.9, 97)   | 95.3<br>(93.6, 96.9) | 98.2<br>(97.2, 99)   | 99<br>(98.4, 99.5)   |
| 14 d                       | 95.8<br>(93, 98.2)   | 95.1<br>(92.9, 97)   | 95.9<br>(94.3, 97.4) | 98.4<br>(97.6, 99.2) | 99.1<br>(98.5, 99.5) |
| Bradycardia EIR            |                      |                      |                      |                      |                      |
| Gestational Age Categories |                      |                      |                      |                      |                      |
|                            | ≤ 26 wk              | 27-28 wk             | 29-30 wk             | 31-32 wk             | 33-34 wk             |
| 1 d                        | 0<br>(0, 0)          |
| 2 d                        | 24.6<br>(15.3, 34.8) | 33.6<br>(24.1, 43.7) | 28.2<br>(21.1, 35.6) | 27.3<br>(19.6, 34.9) | 24.1<br>(15.8, 34)   |
| 3 d                        | 37.1<br>(25.2, 49.1) | 47.5<br>(37.6, 57.5) | 38.3<br>(29.8, 46.8) | 42.5<br>(32.8, 51.9) | 39<br>(28.8, 50.3)   |
| 4 d                        | 49<br>(35.1, 62.6)   | 53.5<br>(42.9, 63.5) | 44.6<br>(35, 53.2)   | 46.5<br>(36.2, 56.4) | 46.2<br>(35, 57.9)   |
| 5 d                        | 58.8<br>(44.4, 72.2) | 59.4<br>(48.2, 69.7) | 52<br>(42.1, 60.9)   | 54.9<br>(44.3, 65.4) | 56.7<br>(45.1, 67.6) |
| 6 d                        | 66.5<br>(53, 79.5)   | 60.9<br>(50, 71.3)   | 59.1<br>(49.4, 68.1) | 60<br>(49.2, 70.6)   | 64.8<br>(53.3, 75.2) |
| 7 d                        | 67.7<br>(54.5, 80.8) | 61.9<br>(50.6, 72.3) | 63.5<br>(53.1, 72.8) | 63.8<br>(53.2, 73.9) | 68.7<br>(57.8, 78.7) |
| 8 d                        | 70.9<br>(57.9, 83.1) | 62.5<br>(51.1, 72.9) | 64.7<br>(54.4, 74.1) | 69.6<br>(59.4, 79.3) | 76.4<br>(66.3, 85.5) |
| 9 d                        | 73.5<br>(60.5, 85.5) | 67.3<br>(56.3, 77.4) | 69<br>(59.4, 77.7)   | 73.9<br>(63.8, 83.4) | 77.8<br>(67.6, 87.2) |

SUPPLEMENTAL APPENDIX 1 Continued

|                              |                      |                      |                      |                      |                      |                      |
|------------------------------|----------------------|----------------------|----------------------|----------------------|----------------------|----------------------|
| 10 d                         | 74.1<br>(60.9, 85.9) | 68.3<br>(57.3, 78.4) | 72<br>(62.9, 80.6)   | 73.9<br>(63.8, 83.4) | 81.3<br>(71.8, 89.8) |                      |
| 11 d                         | 81.2<br>(69, 91.5)   | 70.2<br>(59.5, 80.2) | 72<br>(62.9, 80.6)   | 79.7<br>(71, 87.9)   | 83.1<br>(73.9, 91.3) |                      |
| 12 d                         | 81.8<br>(69.7, 92.3) | 73.1<br>(62.5, 83.2) | 72.2<br>(63, 80.9)   | 81.2<br>(72.5, 89.2) | 83.1<br>(73.9, 91.3) |                      |
| 13 d                         | 81.8<br>(69.7, 92.3) | 74<br>(63.6, 84)     | 72.8<br>(63.7, 81.3) | 82.6<br>(73.9, 90.3) | 83.1<br>(73.9, 91.3) |                      |
| 14 d                         | 81.8<br>(69.7, 92.3) | 74<br>(63.6, 84)     | 76.5<br>(67.6, 84.6) | 85.5<br>(77.6, 92.5) | 84.8<br>(76, 92.8)   |                      |
| Apnea SR                     |                      |                      |                      |                      |                      |                      |
| PMA of Last Event Categories |                      |                      |                      |                      |                      |                      |
|                              | 31-32 wk             | 33-34 wk             | 35-36 wk             | 37-38 wk             | 39-40 wk             | 41-42 wk             |
| 1 d                          | 88.3<br>(81.9, 93.8) | 90.7<br>(89, 92.4)   | 84.4<br>(81.8, 87)   | 74.6<br>(67.3, 82)   | 63.7<br>(50.4, 77.6) | 56.9<br>(33.3, 83.3) |
| 2 d                          | 90.9<br>(85.1, 95.5) | 93.8<br>(92.5, 95.1) | 89.3<br>(87.4, 91.2) | 84.7<br>(79.4, 89.9) | 69.4<br>(58.6, 81.2) | 66.7<br>(47.2, 86.1) |
| 3 d                          | 93.9<br>(89.6, 97.4) | 95<br>(93.8, 96.1)   | 91.5<br>(89.7, 93.1) | 87.5<br>(82.7, 91.9) | 76.1<br>(65, 86.9)   | 81.9<br>(65.3, 95.8) |
| 4 d                          | 94.2<br>(89.9, 97.6) | 95.3<br>(94.1, 96.5) | 92.7<br>(91, 94.2)   | 90.8<br>(86.1, 94.7) | 80.5<br>(69, 90.8)   | 87.5<br>(70.8, 100)  |
| 5 d                          | 94.2<br>(89.9, 97.6) | 95.9<br>(94.8, 97)   | 93.2<br>(91.6, 94.7) | 92.1<br>(87.8, 95.8) | 80.5<br>(69, 90.8)   | 87.5<br>(70.8, 100)  |
| 6 d                          | 94.2<br>(89.9, 97.6) | 96.4<br>(95.4, 97.4) | 94.1<br>(92.6, 95.6) | 93.1<br>(88.9, 96.5) | 83.9<br>(73.6, 93.1) | 91.7<br>(75, 100)    |
| 7 d                          | 95.5<br>(91.7, 98.7) | 96.8<br>(95.8, 97.7) | 94.5<br>(92.9, 95.9) | 95.3<br>(92, 98)     | 86.2<br>(77.6, 94.3) | 91.7<br>(75, 100)    |
| 8 d                          | 95.5<br>(91.7, 98.7) | 97<br>(96, 97.9)     | 94.9<br>(93.4, 96.3) | 95.3<br>(92, 98)     | 86.2<br>(77.6, 94.3) | 91.7<br>(75, 100)    |
| 9 d                          | 96.8<br>(92.9, 99.4) | 97.4<br>(96.5, 98.3) | 95.6<br>(94.3, 96.9) | 95.9<br>(92.9, 98.5) | 89.7<br>(81.6, 96.6) | 91.7<br>(75, 100)    |
| 10 d                         | 97.4<br>(94.2, 100)  | 97.4<br>(96.5, 98.3) | 95.9<br>(94.5, 97.1) | 95.9<br>(92.9, 98.5) | 93.7<br>(85.1, 98.3) | 100<br>(100, 100)    |
| 11 d                         | 97.4<br>(94.2, 100)  | 97.8<br>(96.9, 98.6) | 96.2<br>(94.9, 97.4) | 95.9<br>(92.9, 98.5) | 93.7<br>(86.8, 98.9) | 100<br>(100, 100)    |
| 12 d                         | 97.4<br>(94.2, 100)  | 97.8<br>(97, 98.6)   | 97<br>(95.8, 98)     | 95.9<br>(92.9, 98.5) | 93.7<br>(86.8, 98.9) | 100<br>(100, 100)    |
| 13 d                         | 97.4<br>(94.2, 100)  | 98<br>(97.1, 98.7)   | 97.2<br>(96, 98.2)   | 95.9<br>(92.9, 98.5) | 93.7<br>(86.8, 98.9) | 100<br>(100, 100)    |
| 14 d                         | 98.1<br>(94.9, 100)  | 98.1<br>(97.4, 98.9) | 97.5<br>(96.4, 98.4) | 95.9<br>(92.9, 98.5) | 95.4<br>(89.7, 100)  | 100<br>(100, 100)    |

## SUPPLEMENTAL APPENDIX 1 Continued

| Apnea EIR                    |                      |                      |                      |                      |                      |                      |
|------------------------------|----------------------|----------------------|----------------------|----------------------|----------------------|----------------------|
| PMA of Last Event Categories |                      |                      |                      |                      |                      |                      |
|                              | 31-32 wk             | 33-34 wk             | 35-36 wk             | 37-38 wk             | 39-40 wk             | 41-42 wk             |
| 1 d                          | 0<br>(0, 0)          |
| 2 d                          | 19.6<br>(1.8, 39.3)  | 29.6<br>(22.2, 36.7) | 27.1<br>(20.7, 33.7) | 35.2<br>(21.5, 50.4) | 12.9<br>(3.6, 24.4)  | 20.8<br>(0, 41.7)    |
| 3 d                          | 42.9<br>(17.9, 67.9) | 41.4<br>(33.2, 49.3) | 40.5<br>(33, 48.1)   | 44.4<br>(29.3, 59.5) | 32<br>(13.2, 51.4)   | 54.2<br>(16.7, 87.5) |
| 4 d                          | 44.6<br>(21.4, 69.6) | 46.3<br>(37.7, 54.7) | 48.1<br>(40, 56.4)   | 58.8<br>(43, 74.4)   | 44.4<br>(22.5, 68.8) | 66.7<br>(25, 100)    |
| 5 d                          | 44.6<br>(21.4, 69.6) | 53<br>(44.3, 61.4)   | 51.3<br>(43, 59.4)   | 64.5<br>(48.1, 79.3) | 44.4<br>(22.5, 68.8) | 66.7<br>(25, 100)    |
| 6 d                          | 44.6<br>(21.4, 69.6) | 59.1<br>(50.4, 67.4) | 57.9<br>(49.2, 66)   | 68.8<br>(53.1, 83.6) | 53.8<br>(31.3, 75)   | 75<br>(25, 100)      |
| 7 d                          | 57.1<br>(28.6, 85.7) | 63.2<br>(54.4, 71.3) | 60.3<br>(51.6, 68.6) | 76.6<br>(61.7, 89.8) | 58.1<br>(36.3, 78.1) | 75<br>(25, 100)      |
| 8 d                          | 57.1<br>(28.6, 85.7) | 66.5<br>(58.3, 74.8) | 63.1<br>(54.6, 71.1) | 76.6<br>(61.7, 89.8) | 58.1<br>(36.3, 78.1) | 75<br>(25, 100)      |
| 9 d                          | 71.4<br>(42.9, 92.9) | 71.1<br>(63.1, 79.3) | 69.4<br>(61.3, 77.2) | 79.7<br>(65.6, 92.2) | 70.6<br>(50.6, 88.1) | 75<br>(25, 100)      |
| 10 d                         | 78.6<br>(57.1, 100)  | 71.1<br>(63.1, 79.3) | 71.3<br>(63.2, 78.8) | 79.7<br>(65.6, 92.2) | 75<br>(56.3, 93.8)   | 100<br>(100, 100)    |
| 11 d                         | 78.6<br>(57.1, 100)  | 75.9<br>(68, 83.1)   | 74.2<br>(66.2, 81.6) | 79.7<br>(65.6, 92.2) | 78.1<br>(59.4, 93.8) | 100<br>(100, 100)    |
| 12 d                         | 78.6<br>(57.1, 100)  | 76.4<br>(68.6, 83.7) | 77.8<br>(70.2, 84.7) | 79.7<br>(65.6, 92.2) | 78.1<br>(59.4, 93.8) | 100<br>(100, 100)    |
| 13 d                         | 78.6<br>(57.1, 100)  | 78.3<br>(70.6, 85)   | 79<br>(71.5, 85.9)   | 79.7<br>(65.6, 92.2) | 78.1<br>(59.4, 93.8) | 100<br>(100, 100)    |
| 14 d                         | 85.7<br>(64.3, 100)  | 80.2<br>(73, 86.8)   | 81.7<br>(74.5, 88.3) | 79.7<br>(65.6, 92.2) | 84.4<br>(65.6, 100)  | 100<br>(100, 100)    |
| Bradycardia SR               |                      |                      |                      |                      |                      |                      |
| PMA of Last Event Categories |                      |                      |                      |                      |                      |                      |
|                              | 31-32 wk             | 33-34 wk             | 35-36 wk             | 37-38 wk             | 39-40 wk             | 41-42 wk             |
| 1 d                          | 87.8<br>(81.6, 93.6) | 87.7<br>(85.8, 89.6) | 78.1<br>(75, 81.1)   | 67<br>(59.6, 73.8)   | 58.8<br>(45.9, 72.3) | 54.2<br>(30.6, 77.8) |
| 2 d                          | 89.7<br>(84.2, 94.7) | 91.8<br>(90.4, 93.2) | 86.1<br>(83.9, 88.3) | 78<br>(72.1, 83.4)   | 72<br>(60.6, 83)     | 63.9<br>(41.7, 86.1) |
| 3 d                          | 92.7<br>(88.5, 96.6) | 93.3<br>(91.9, 94.6) | 89.3<br>(87.3, 91.1) | 83.3<br>(78, 87.9)   | 77.8<br>(67.5, 87.4) | 83.3<br>(61.1, 100)  |
| 4 d                          | 92.7<br>(88.5, 96.6) | 94<br>(92.7, 95.1)   | 90.8<br>(88.9, 92.6) | 88.2<br>(83.9, 92.4) | 81.6<br>(71.8, 90.5) | 88.9<br>(66.7, 100)  |
| 5 d                          | 92.7<br>(88.5, 96.6) | 95.5<br>(94.4, 96.4) | 92.1<br>(90.3, 93.7) | 90.7<br>(86.7, 94.4) | 85.1<br>(75, 94)     | 88.9<br>(66.7, 100)  |
| 6 d                          | 93.2<br>(88.9, 97)   | 96.1<br>(95.1, 97.1) | 93.1<br>(91.4, 94.6) | 92.9<br>(89.2, 96)   | 86.3<br>(76.2, 94.6) | 88.9<br>(66.7, 100)  |

SUPPLEMENTAL APPENDIX 1 Continued

|                              |                      |                      |                      |                      |                      |                     |
|------------------------------|----------------------|----------------------|----------------------|----------------------|----------------------|---------------------|
| 7 d                          | 93.8<br>(89.7, 97.4) | 96.7<br>(95.6, 97.5) | 93.6<br>(91.9, 95)   | 93<br>(89.4, 96.2)   | 88.1<br>(80.4, 95.2) | 88.9<br>(66.7, 100) |
| 8 d                          | 93.8<br>(89.7, 97.4) | 97<br>(96.1, 97.8)   | 94.1<br>(92.4, 95.5) | 93<br>(89.4, 96.2)   | 91.7<br>(84.5, 98.2) | 94.4<br>(83.3, 100) |
| 9 d                          | 95.5<br>(91.7, 98.7) | 97.3<br>(96.4, 98.1) | 94.4<br>(92.7, 95.8) | 95<br>(92.1, 97.8)   | 91.7<br>(84.5, 98.2) | 94.4<br>(83.3, 100) |
| 10 d                         | 96.2<br>(92.3, 99.4) | 97.3<br>(96.4, 98.1) | 94.9<br>(93.3, 96.3) | 95<br>(92.1, 97.8)   | 91.7<br>(84.5, 98.2) | 100<br>(100, 100)   |
| 11 d                         | 96.2<br>(92.3, 99.4) | 97.5<br>(96.7, 98.3) | 95.3<br>(93.8, 96.6) | 96.6<br>(93.9, 98.8) | 93.5<br>(86.9, 98.8) | 100<br>(100, 100)   |
| 12 d                         | 96.2<br>(92.3, 99.4) | 97.7<br>(96.8, 98.4) | 95.7<br>(94.3, 97)   | 96.6<br>(93.9, 98.8) | 93.5<br>(86.9, 98.8) | 100<br>(100, 100)   |
| 13 d                         | 96.2<br>(92.3, 99.4) | 97.7<br>(96.8, 98.4) | 96<br>(94.7, 97.2)   | 97.6<br>(95.3, 99.4) | 93.5<br>(86.9, 98.8) | 100<br>(100, 100)   |
| 14 d                         | 96.2<br>(92.3, 99.4) | 97.8<br>(97, 98.5)   | 96.3<br>(95.1, 97.5) | 97.6<br>(95.3, 99.4) | 95.2<br>(89.3, 100)  | 100<br>(100, 100)   |
| Bradycardia EIR              |                      |                      |                      |                      |                      |                     |
| PMA of Last Event Categories |                      |                      |                      |                      |                      |                     |
|                              | 31-32 wk             | 33-34 wk             | 35-36 wk             | 37-38 wk             | 39-40 wk             | 41-42 wk            |
| 1 d                          | 0<br>(0, 0)          | 0<br>(0, 0)         |
| 2 d                          | 11.9<br>(0, 25)      | 29.7<br>(23.5, 36)   | 32.8<br>(27.3, 39)   | 27.6<br>(17.1, 38.4) | 30.7<br>(14.4, 48)   | 20.8<br>(0, 41.7)   |
| 3 d                          | 34.5<br>(14.3, 54.8) | 41.6<br>(34.8, 48.3) | 46.6<br>(40.3, 53.4) | 41.3<br>(28.7, 53.4) | 44.4<br>(25.9, 63.6) | 62.5<br>(25, 100)   |
| 4 d                          | 34.5<br>(14.3, 54.8) | 46.7<br>(39.9, 53.8) | 53.4<br>(46.7, 60.2) | 54.5<br>(40.5, 67.9) | 51.6<br>(31, 72.4)   | 75<br>(25, 100)     |
| 5 d                          | 34.5<br>(14.3, 54.8) | 59.9<br>(52.7, 67.1) | 59.2<br>(52.3, 66.4) | 63.1<br>(49, 76.2)   | 58.8<br>(35.3, 82.4) | 75<br>(25, 100)     |
| 6 d                          | 38.1<br>(16.7, 59.5) | 65.5<br>(58.4, 72.3) | 65.2<br>(58.2, 72.2) | 71.8<br>(57.8, 84.3) | 61.8<br>(38.2, 82.4) | 75<br>(25, 100)     |
| 7 d                          | 42.9<br>(17.9, 64.3) | 70.4<br>(63.4, 76.9) | 67<br>(59.9, 74.1)   | 72.1<br>(58, 84.5)   | 64.7<br>(41.2, 85.3) | 75<br>(25, 100)     |
| 8 d                          | 42.9<br>(17.9, 64.3) | 73.9<br>(67.6, 80.1) | 70.3<br>(63.5, 77.1) | 72.1<br>(58, 84.5)   | 76.5<br>(55.9, 94.1) | 87.5<br>(62.5, 100) |
| 9 d                          | 60.7<br>(35.7, 85.7) | 75.9<br>(69.4, 82.2) | 71.8<br>(65.1, 78.5) | 80.4<br>(67.9, 90.8) | 76.5<br>(55.9, 94.1) | 87.5<br>(62.5, 100) |
| 10 d                         | 67.9<br>(42.9, 89.3) | 75.9<br>(69.4, 82.2) | 74.8<br>(68.1, 81.2) | 80.4<br>(67.9, 90.8) | 76.5<br>(55.9, 94.1) | 100<br>(100, 100)   |
| 11 d                         | 67.9<br>(42.9, 89.3) | 78.7<br>(72.5, 84.6) | 76.5<br>(70, 82.5)   | 86.6<br>(76.4, 95.1) | 79.4<br>(58.8, 94.1) | 100<br>(100, 100)   |
| 12 d                         | 67.9<br>(42.9, 89.3) | 79.8<br>(73.5, 85.6) | 78.3<br>(71.9, 84.2) | 86.6<br>(76.4, 95.1) | 79.4<br>(58.8, 94.1) | 100<br>(100, 100)   |
| 13 d                         | 67.9<br>(42.9, 89.3) | 79.8<br>(73.5, 85.6) | 79.6<br>(73.5, 85.4) | 90.8<br>(82.3, 97.9) | 79.4<br>(58.8, 94.1) | 100<br>(100, 100)   |
| 14 d                         | 67.9<br>(42.9, 89.3) | 81.1<br>(75.1, 86.7) | 81.6<br>(75.8, 87.2) | 90.8<br>(82.3, 97.9) | 85.3<br>(67.6, 100)  | 100<br>(100, 100)   |
